# Supplementary material for: LncRNA CASC2 is involved in the development of chronic obstructive pulmonary disease via targeting miR-18a-5p/IGF1 axis
Source: PubMed Central journal article supplement — Ther Adv Respir Dis. 2021 Jul 15;15:17534666211028072. doi: 10.1177/17534666211028072 (PMC8290508; doi:10.1177/17534666211028072), 2021-07-15
Supplement: sj-pdf-2-tar-10.1177_17534666211028072.pdf [file sj-pdf-2-tar-10.1177_17534666211028072.pdf]

## Author Response 2

Reviewer: 2

### Comments to the Author

In the revised MS authors measured the level of CASC2 and miR- 8a in the culture medium of 16HBE cells. But, they missed adding the detailed procedure in the method section.

Response: Thank you for your kind reminder, and we are sorry for our ignore. The methods were detailed according to the comments.
